# Supplementary material for: Dysregulation of peripheral expression of the YWHA genes during conversion to psychosis
Source: PubMed Central journal article supplement (PMC7299951; doi:10.1038/s41598-020-66901-1), 2020-06-17
Supplement: 41598_2020_66901_MOESM1_ESM.pdf [file 41598_2020_66901_MOESM1_ESM.pdf]

# Dysregulation of peripheral expression of the YWHA genes during conversion to psychosis

Fanny Demars<sup>1</sup>, Oussama Kebir<sup>1,2</sup>, Aude Marzo<sup>1</sup>, Anton Iftimovici<sup>1,3</sup>, Catherine Schramm<sup>4</sup>, ICAAR Study Group, Marie-Odile Krebs<sup>1,2,\*</sup>, Boris Chaumette<sup>1,2,5</sup>

- 1) Institut de Psychiatrie et Neurosciences de Paris, INSERM UMR 1266, Laboratoire de Physiopathologie des Maladies Psychiatriques, Université de Paris, GDR3557-Institut de Psychiatrie, Paris, France
- 2) GHU Paris Psychiatrie et Neurosciences, Paris, France
- 3) NeuroSpin, Atomic Energy Commission, Unité d'Analyse et de Traitement de l'Information, Gif-sur-Yvette, France
- 4) CHU Sainte Justine, Université de Montréal, Montréal, Canada
- 5) Department of Psychiatry, McGill University, Montréal, Canada

\*Corresponding author: Marie-Odile Krebs – mo.krebs@ghu-paris.fr – Pôle PEPIT – GHU Paris Psychiatrie et Neurosciences - 7 rue Cabanis – 75014 Paris (France)

## Contributors of the ICAAR Study Group:

Isabelle Amado<sup>2</sup>, Julie Bourgin<sup>2</sup>, Claire Daban Huard<sup>2</sup>, Célia Jantac Mam-Lam-Fook<sup>2</sup>, Marion Plaze<sup>2</sup>, Fabrice Rivollier<sup>2</sup>

Supplementary Table 1: Correlation matrix between baseline expression levels of YWHA genes and clinical scores at the end of the follow-up

|                                  | CGI    | SOFAS            | BPRS           | PANSS<br>POSITIVE | PANSS<br>NEGATIVE | PANSS<br>GENERAL | PANSS<br>TOTALE | MADRS           | YMRS   | CAARMS<br>score |
|----------------------------------|--------|------------------|----------------|-------------------|-------------------|------------------|-----------------|-----------------|--------|-----------------|
| YWHAB                            | 0.232  | -0.202           | 0.148          | 0.009             | <b>0.374 **</b>   | 0.232            | 0.247           | -0.039          | -0.213 | 0.205           |
| YWHAE                            | 0.211  | <b>-0.375 **</b> | 0.062          | 0.079             | <b>0.294 *</b>    | 0.101            | 0.178           | 0.177           | -0.011 | 0.239           |
| YWHAG                            | 0.098  | -0.173           | 0.145          | 0.23              | 0.073             | 0.066            | 0.152           | -0.032          | 0.012  | <b>0.311 *</b>  |
| YWHAH                            | -0.048 | 0.029            | 0.008          | 0.095             | -0.091            | -0.009           | -0.004          | -0.114          | -0.113 | 0.041           |
| YWHAQ                            | 0.171  | <b>-0.33 *</b>   | <b>0.262 *</b> | 0.117             | <b>0.369 **</b>   | 0.111            | <b>0.265 *</b>  | -0.065          | 0.073  | <b>0.361 **</b> |
| YWHAS                            | -0.169 | 0.031            | -0.04          | -0.224            | 0.237             | -0.006           | 0.027           | <b>-0.269 *</b> | -0.127 | -0.031          |
| YWHAZ                            | 0.118  | -0.123           | 0.164          | 0.203             | 0.147             | 0.075            | 0.154           | 0.098           | -0.09  | 0.259           |
| First<br>Dimension<br>of the PCA | 0,155  | -0,255           | 0,151          | 0,111             | 0,266             | 0,01             | 0,191           | -0,058          | -0,051 | <b>0,341 *</b>  |

Each cell indicates the Spearman correlation coefficient between clinical scores at the end of follow-up and baseline YWHA mRNA expression levels irrespective of the clinical status of the participant. Coefficients with p-values <0.05 are in bold (\*  $p \leq 0.05$  \*\*  $p \leq 0.01$  \*\*\*  $p \leq 0.001$ )

Supplementary Table 2: Correlation matrix between the expression levels of the different YWHA genes

|       | YWHAB          | YWHAE          | YWHAG          | YWHAH          | YWHAQ          | YWHAS | YWHAZ |
|-------|----------------|----------------|----------------|----------------|----------------|-------|-------|
| YWHAB | 1              |                |                |                |                |       |       |
| YWHAE | <b>0.34***</b> | 1              |                |                |                |       |       |
| YWHAG | <b>0.23**</b>  | <b>0.40***</b> | 1              |                |                |       |       |
| YWHAH | -0.01          | <b>0.33***</b> | <b>0.72***</b> | 1              |                |       |       |
| YWHAQ | <b>0.47***</b> | <b>0.35***</b> | <b>0.24**</b>  | 0.02           | 1              |       |       |
| YWHAS | <b>0.28**</b>  | <b>0.17*</b>   | 0.05           | -0.03          | <b>0.34***</b> | 1     |       |
| YWHAZ | <b>0.17*</b>   | <b>0.48***</b> | <b>0.48***</b> | <b>0.50***</b> | <b>0.29***</b> | 0.06  | 1     |

Each cell indicates the Pearson correlation coefficient between the mRNA expression levels of different YWHA genes for all available samples (baseline and end of follow-up). P-values <0.05 are in bold (\*  $p \leq 0.05$  \*\*  $p \leq 0.01$  \*\*\*  $p \leq 0.001$ )

Supplementary Table 3: Significant Pearson's correlations between CpG methylation and expression levels of YWHA genes

| Gene  | CpG        | Genomic Coordinate | Chromosome | CpG location         | Correlation coefficient | P-value |
|-------|------------|--------------------|------------|----------------------|-------------------------|---------|
| YWHAG | cg03707599 | 75956931           | 7          | intragenic           | 0,457                   | 0,0023  |
| YWHAG | cg10167463 | 75959203           | 7          | intragenic           | 0,427                   | 0,0048  |
| YWHAG | cg10738119 | 75957040           | 7          | intragenic           | 0,316                   | 0,041   |
| YWHAG | cg17100201 | 75958978           | 7          | intragenic           | 0,316                   | 0,041   |
| YWHAG | cg26162326 | 75957061           | 7          | intragenic           | 0,357                   | 0,020   |
| YWHAZ | cg03720887 | 101963845          | 8          | intragenic, promoter | -0,344                  | 0,027   |
| YWHAZ | cg04962480 | 101962118          | 8          | intragenic           | -0,370                  | 0,017   |

Only significant results with P-values <0.05 are shown.

#### Supplementary Table 4: Studies used as reference for the computation of chlorpromazine equivalents

| Typical antipsychotic    | Reference study                                           |
|--------------------------|-----------------------------------------------------------|
| Klorprotixene            | (Kroken et al., 2009; Leucht et al., 2014) <sup>1,2</sup> |
| Levomepromazine          | (Kroken et al., 2009) <sup>1</sup>                        |
| Trifluorpromazine        | (Davis, 1975) <sup>3</sup>                                |
| Thioridazine             | (Andreasen et al., 2010) <sup>4</sup>                     |
| Dixyrazine               | (Kroken et al., 2009) <sup>1</sup>                        |
| Prochlorperazine         | (Davis, 1975; Woods, 2005) <sup>3,5</sup>                 |
| Perphenazine             | (Andreasen et al., 2010) <sup>4</sup>                     |
| Perphenazine decanoate   | (Kroken et al., 2009) <sup>1</sup>                        |
| Zuclopenthixol           | (Kroken et al., 2009) <sup>1</sup>                        |
| Zuclopenthixol decanoate | (Kroken et al., 2009) <sup>1</sup>                        |
| Flupenthixol             | (Kroken et al., 2009) <sup>1</sup>                        |
| Flupenthixol decanoate   | (Kroken et al., 2009) <sup>1</sup>                        |
| Fluphenazine             | (Andreasen et al., 2010) <sup>4</sup>                     |
| Fluphenazine decanoate   | (Andreasen et al., 2010) <sup>4</sup>                     |
| Trifluoperazine          | (Andreasen et al., 2010) <sup>4</sup>                     |
| Acetophenazine           | (Davis, 1975; Leucht et al., 2014) <sup>2,3</sup>         |

|                                 |                                            |     |
|---------------------------------|--------------------------------------------|-----|
| Carphenazine                    | (Davis, 1975; Leucht et al., 2014)         | 2,3 |
| Butaperazine                    | (Davis, 1975; Leucht et al., 2014)         | 2,3 |
| Mesoridazine                    | (Davis, 1975; Leucht et al., 2014)         | 2,3 |
| Piperacetazine                  | (Davis, 1975; Leucht et al., 2014)         | 2,3 |
| Haloperidol                     | (Andreasen et al., 2010)                   | 4   |
| Haloperidol decanoate           | (Andreasen et al., 2010)                   | 4   |
| Chlorprothixene                 | (Davis, 1975)                              | 3   |
| Thiothixene                     | (Andreasen et al., 2010)                   | 4   |
| Molindone                       | (Woods, 2005)                              | 5   |
| Prochlorperazine                | (Leucht et al., 2014; Woods, 2005)         | 2,5 |
| <b>Atypical antipsychotics</b>  |                                            |     |
| Risperidone                     | (Andreasen et al., 2010)                   | 4   |
| Risperidone<br>action prolongée | (Kroken et al., 2009; Woods, 2005)         | 1,5 |
| Olanzapine                      | (Andreasen et al., 2010)                   | 4   |
| Quetiapine                      | (Andreasen et al., 2010)                   | 4   |
| Ziprasidone                     | (Andreasen et al., 2010)                   | 4   |
| Aripiprazole                    | (Andreasen et al., 2010)                   | 4   |
| clozapine                       | (Andreasen et al., 2010)                   | 4   |
| Asenapine                       | (Leucht et al., 2014; Woods, 2005)         | 2,5 |
| Iloperidone                     | (Leucht et al., 2014; Woods, 2005)         | 2,5 |
| Lurasidone                      | (Leucht et al., 2014; Woods, 2005)         | 2,5 |
| Paliperidone                    | (Leucht et al., 2014; Woods, 2005)         | 2,5 |
| Sertindole                      | (Kroken et al., 2009; Leucht et al., 2014) | 1,2 |
| Amisulpride                     | (Bazire, 2007)                             | 6   |
| Sulpride                        | (Bazire, 2007)                             | 6   |

Supplementary Figure 1: Random permutations analysis on the logistic regressions used to compare baseline expression of YWHA genes between converters and non-converters

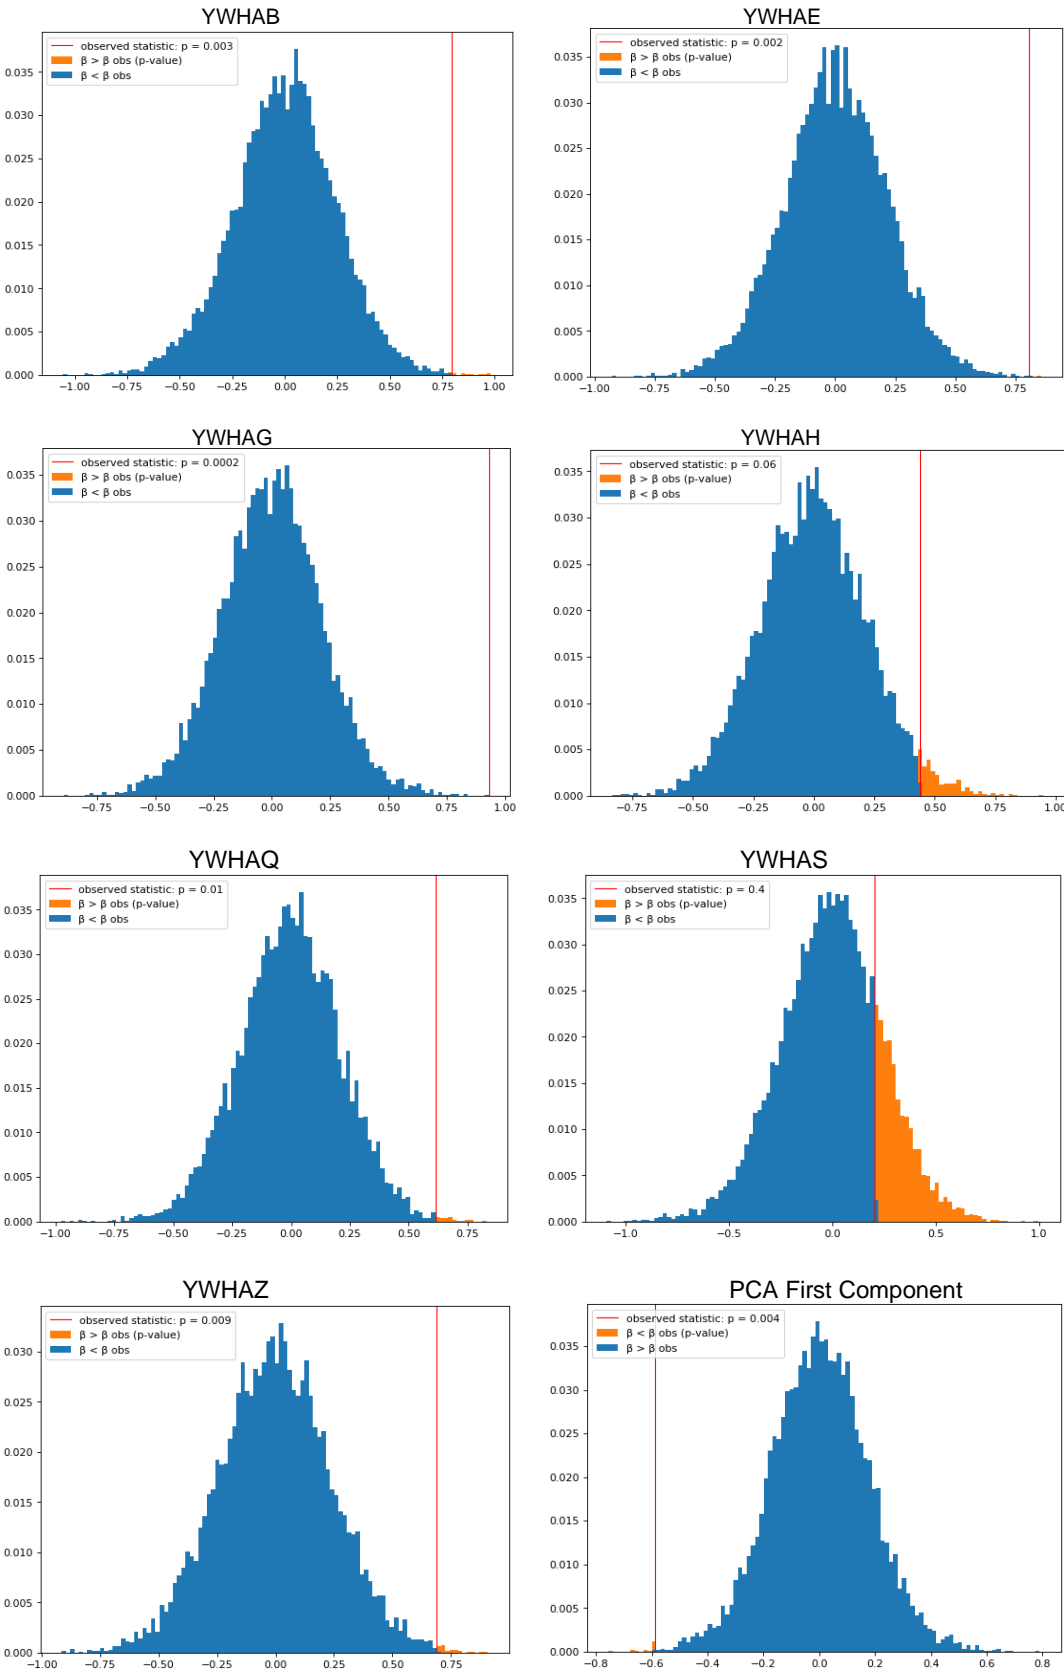

Supplementary Figure 2: Random permutations analysis on the logistic regressions used to compare longitudinal changes in expression of YWHA genes between converters and non-converters

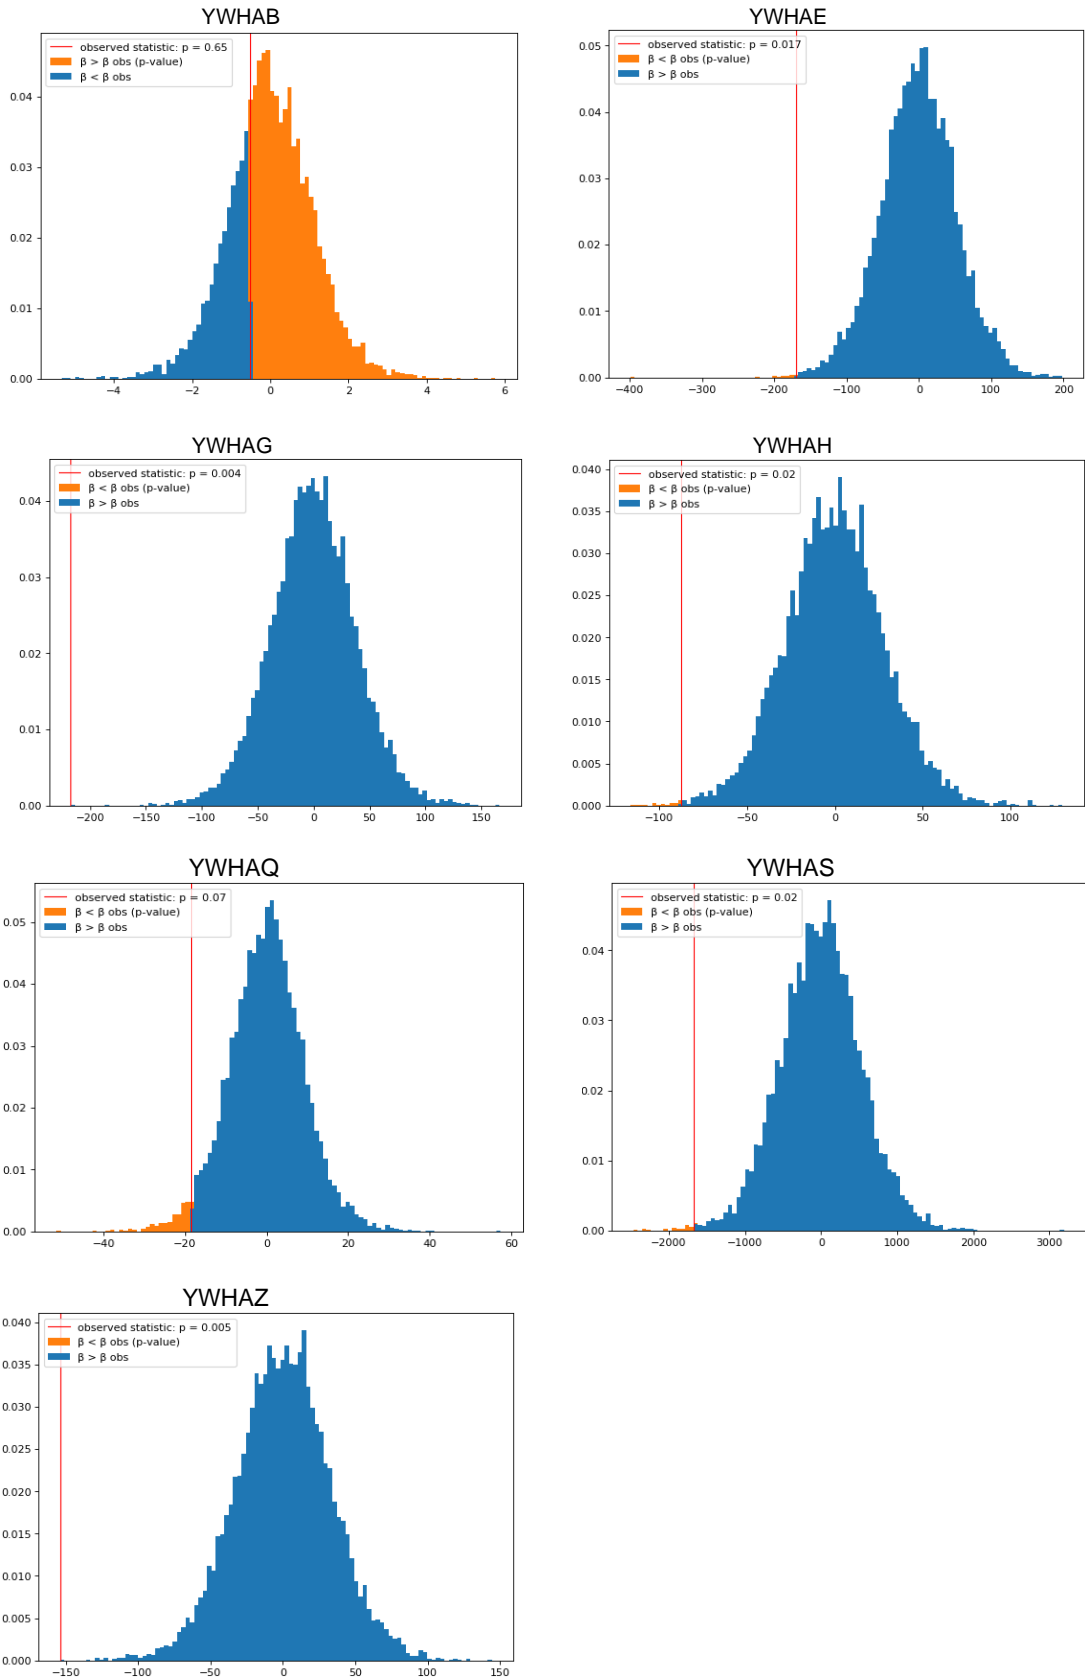

Supplementary Figure 3: Correlation plot between the expression levels of the different YWHA genes

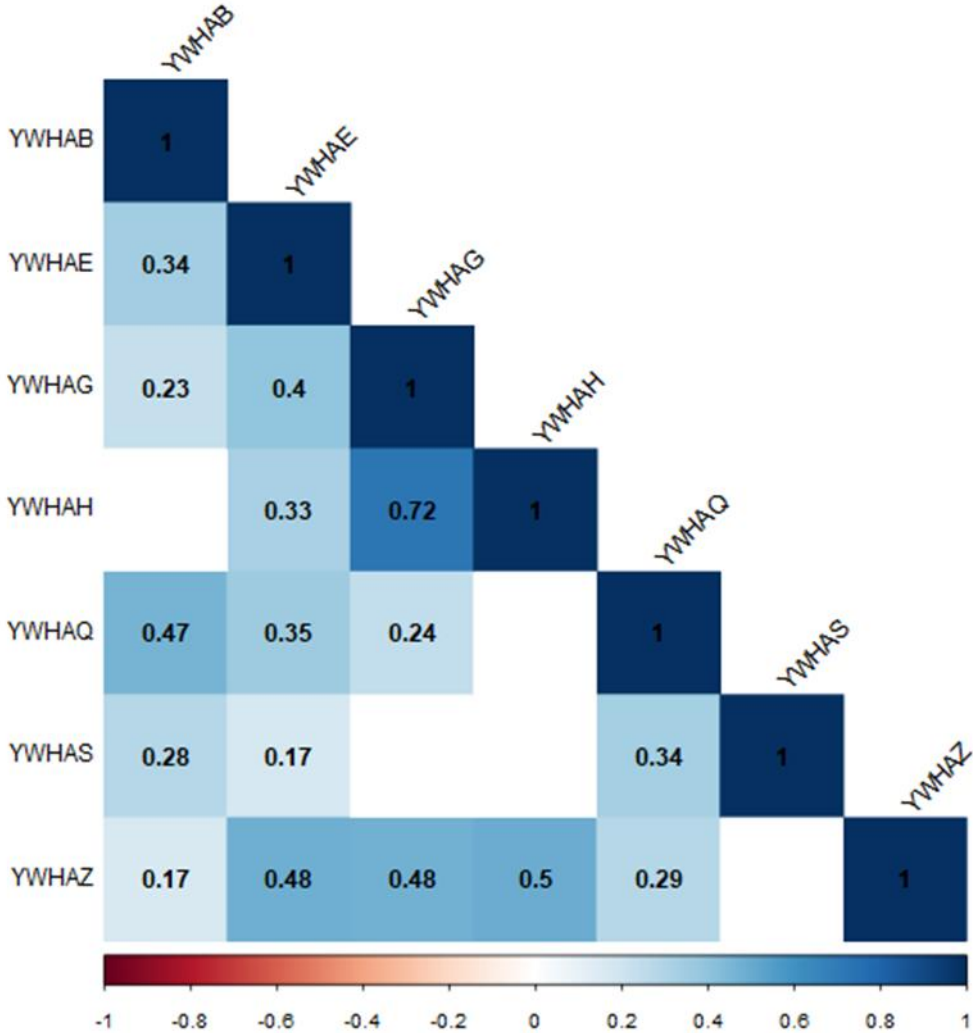

Color intensity is proportional to the value of Pearson correlation coefficient that is indicated inside of each cell. The positive correlations are displayed in blue and negative correlations in red (the color code for the correlation values is presented below the matrix). The non-significant correlation coefficients ( $p > 0.05$ ) are not displayed (blank cases in the matrix).

### Supplementary references :

1. Kroken, R. A., Johnsen, E., Ruud, T., Wentzel-Larsen, T. & Jørgensen, H. A. Treatment of schizophrenia with antipsychotics in Norwegian emergency wards, a cross-sectional national study. *BMC Psychiatry* 9, 24 (2009).
2. Leucht, S. et al. Dose equivalents for second-generation antipsychotics: the minimum effective dose method. *Schizophr. Bull.* 40, 314–326 (2014).
3. Davis, J. M. Dose equivalence of the antipsychotic drugs. in *Catecholamines and Schizophrenia* 65–73 (Elsevier, 1975).
4. Andreasen, N. C., Pressler, M., Nopoulos, P., Miller, D. & Ho, B.-C. Antipsychotic dose equivalents and dose-years: a standardized method for comparing exposure to different drugs. *Biol. Psychiatry* 67, 255–262 (2010).
5. Woods, S. W. Calculation of CPZ Equivalents. at [www.scottwilliamwoods.com/files/Equivtext.doc](http://www.scottwilliamwoods.com/files/Equivtext.doc) (2005).
6. Bazire, S. *Psychotropic Drug Directory, Maudsley Guideline.* (2007).
